# Supplementary material
Source: PubMed Central journal article supplement (PMC1458811)

# GFAP Volume Fraction

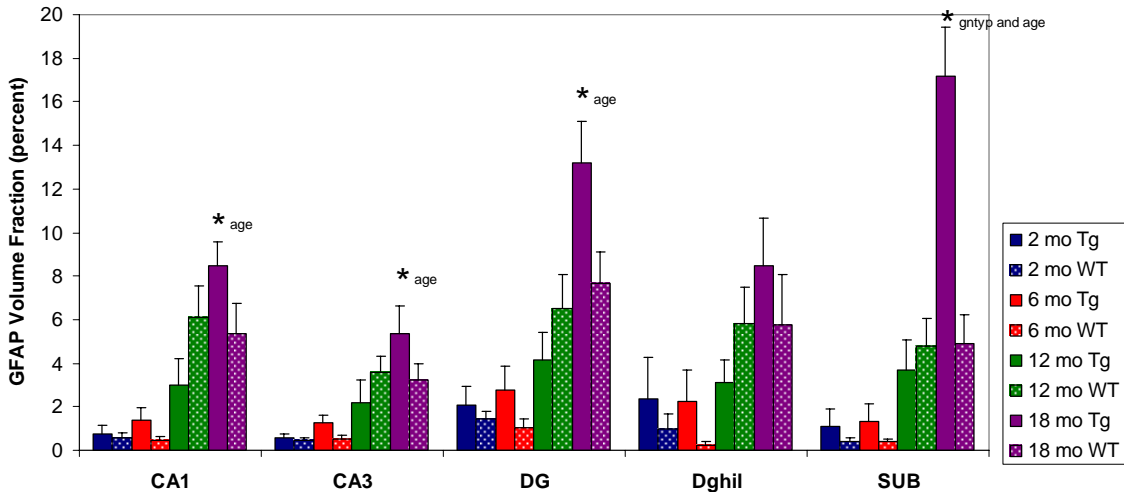

Supplement: pnas_0600948103_1.pdf [file pnas_0600948103_1.pdf]

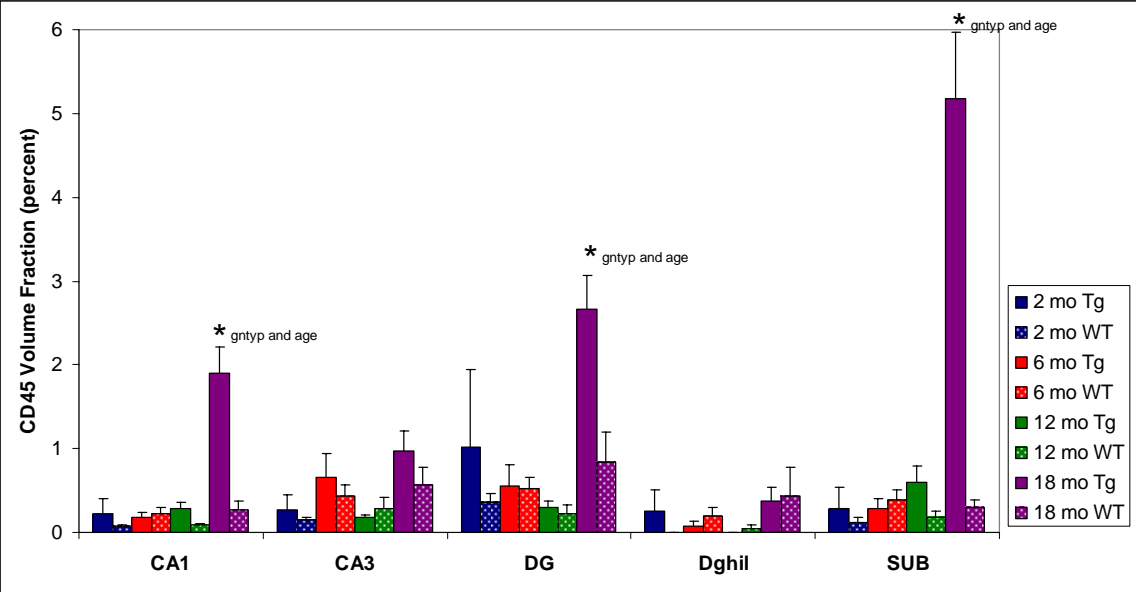

Supplement: pnas_0600948103_2.pdf [file pnas_0600948103_2.pdf]

## Synaptophysin R.O.D.

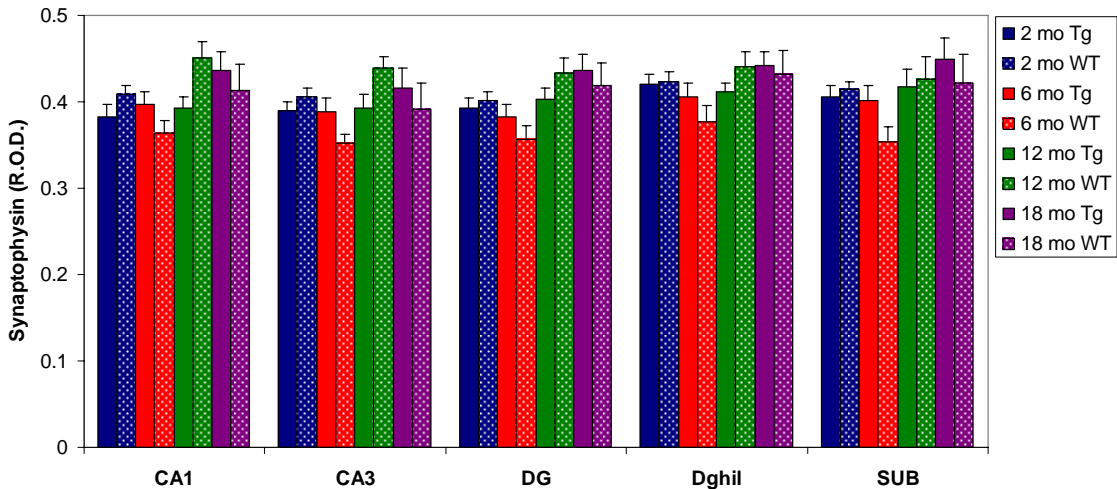

Supplement: pnas_0600948103_3.pdf [file pnas_0600948103_3.pdf]

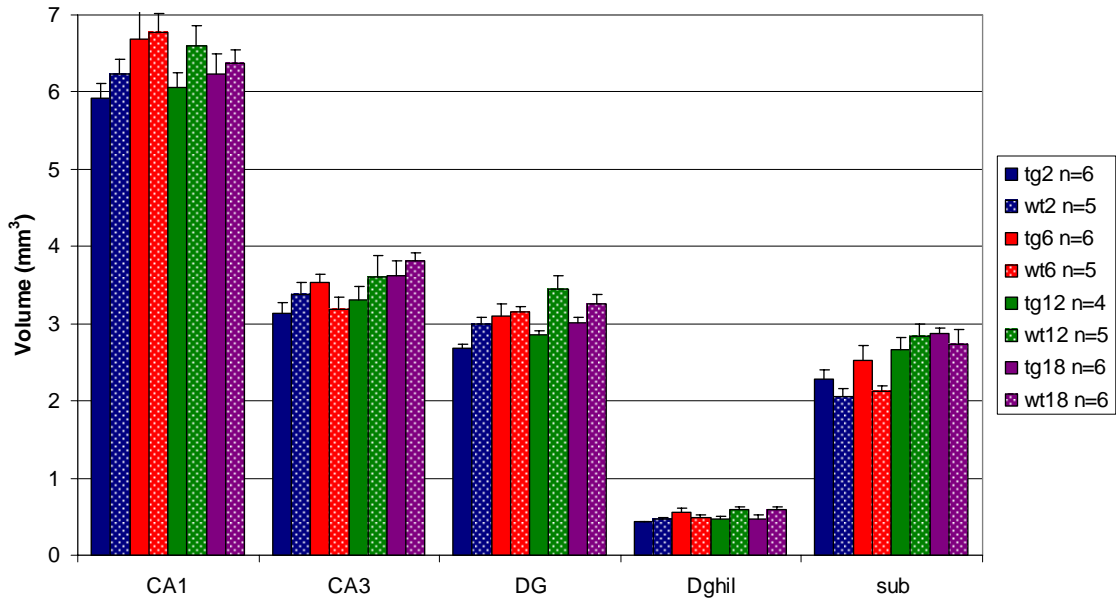

Supplement: pnas_0600948103_4.pdf [file pnas_0600948103_4.pdf]
